# Supplementary material
Source: Springer Nature journal article supplement (http://springermedizin.de/resource/supplementary/12906_2013_1618_MOESM3_ESM.pdf/9522712)

## A Control

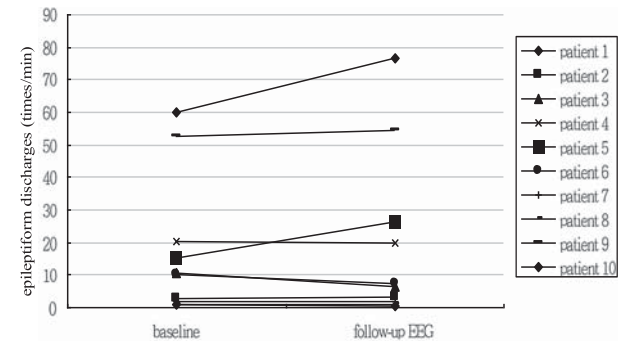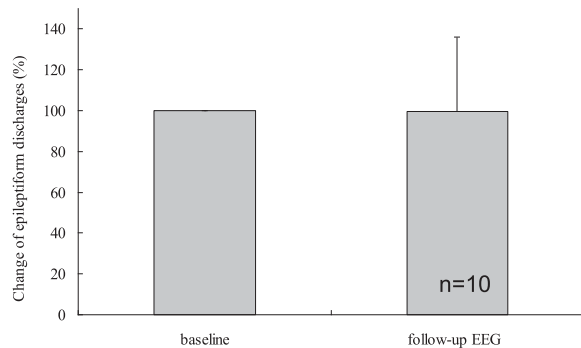

## B Treatment

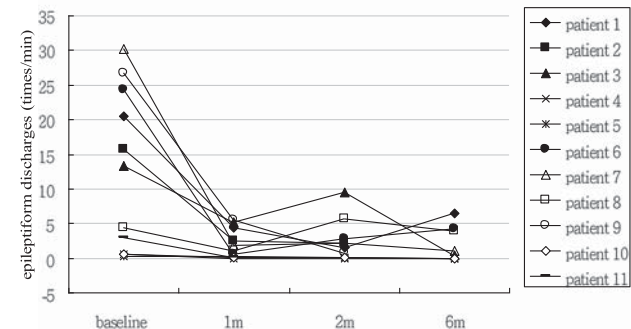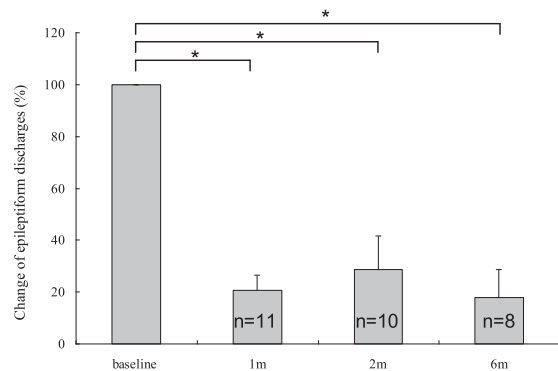

Supplement: MOESM3 [file 9522712]
